# Supplementary material
Source: PubMed Central journal article supplement (PMC6215511)
Supplement: NIHMS1503182-supplement-2.pdf [file NIHMS1503182-supplement-2.pdf]

Figure S2

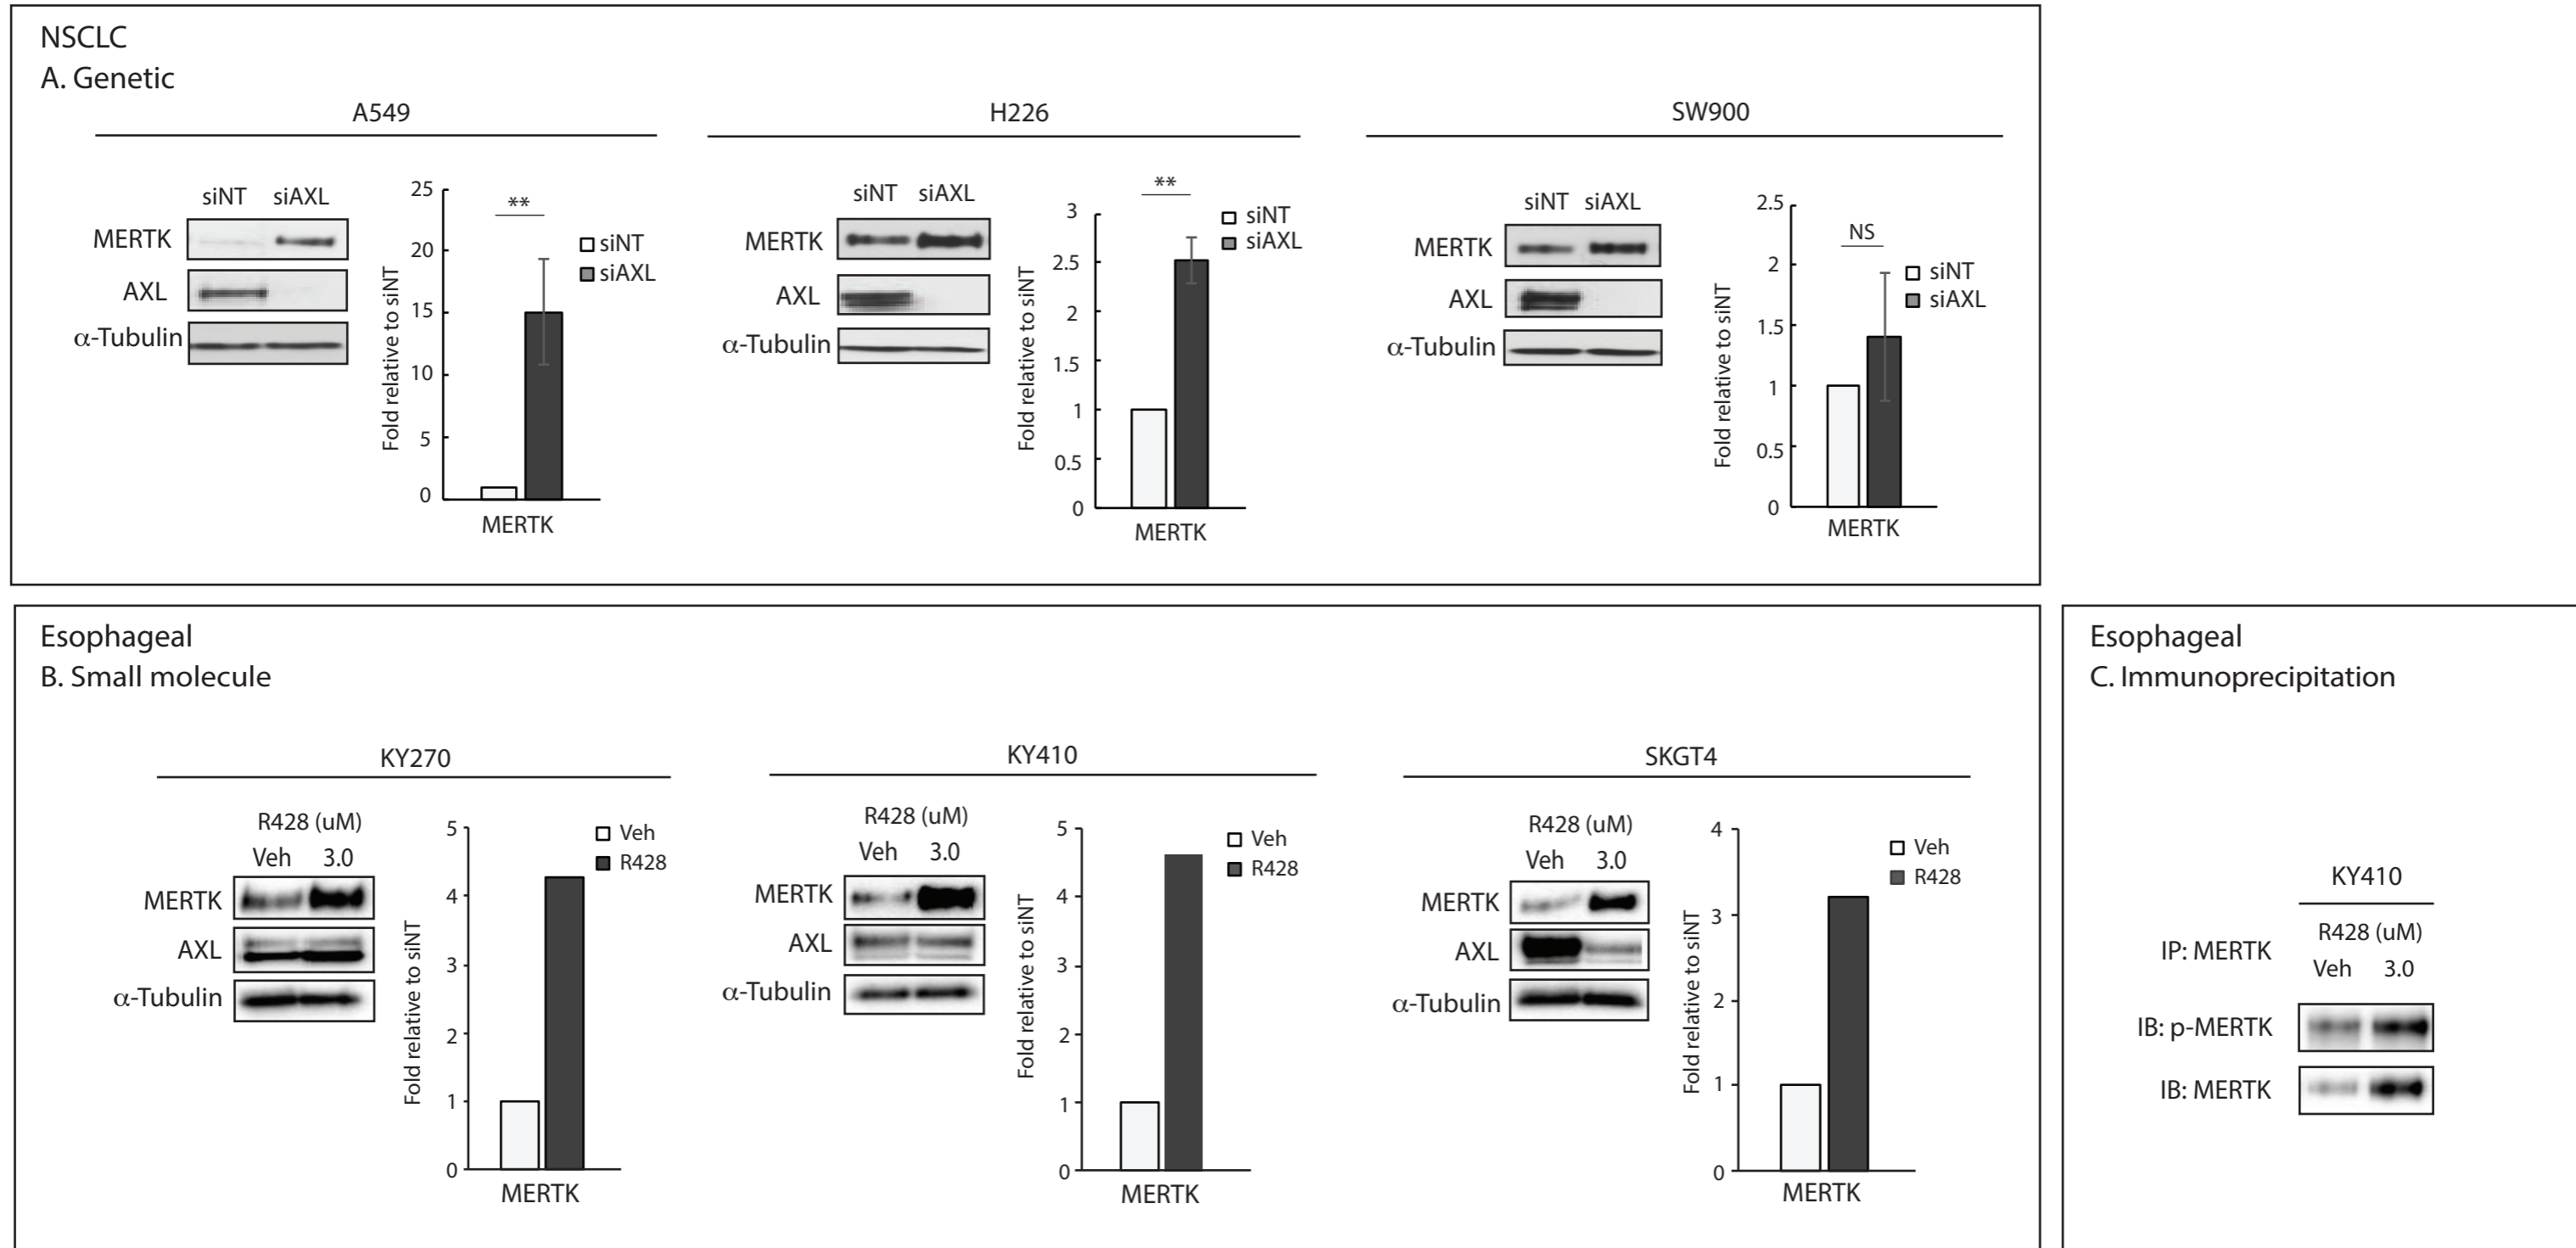

**Figure S2: Inhibition of AXL upregulates MERTK expression and activity in additional cell culture models.**

(A) NSCLC cell lines were transfected with AXL siRNA (siAXL) or non-targeting siRNA (siNT) and (B) Esophageal cancer cell lines were treated with R428 or vehicle (DMSO). After 72 hours, cell lysates were prepared and the indicated proteins were detected by immunoblot.  $\alpha$ -Tubulin was used as a loading control. MERTK expression was quantitated by densitometry using Image J software. Mean values and standard errors derived from 3 independent experiments are shown for NSCLC cells.  $**p < 0.01$ , NS=not significant. (C) KY410 esophageal cancer cells were treated with vehicle or R428 for 24 hours and cell lysates were prepared. MERTK was immunoprecipitated and phosphorylated and total MERTK proteins were detected by immunoblot. The images shown are representative of 2 independent experiments.
