# Supplementary material
Source: PubMed Central journal article supplement (PMC6215511)
Supplement: NIHMS1503182-supplement-3.pdf [file NIHMS1503182-supplement-3.pdf]

Figure S3

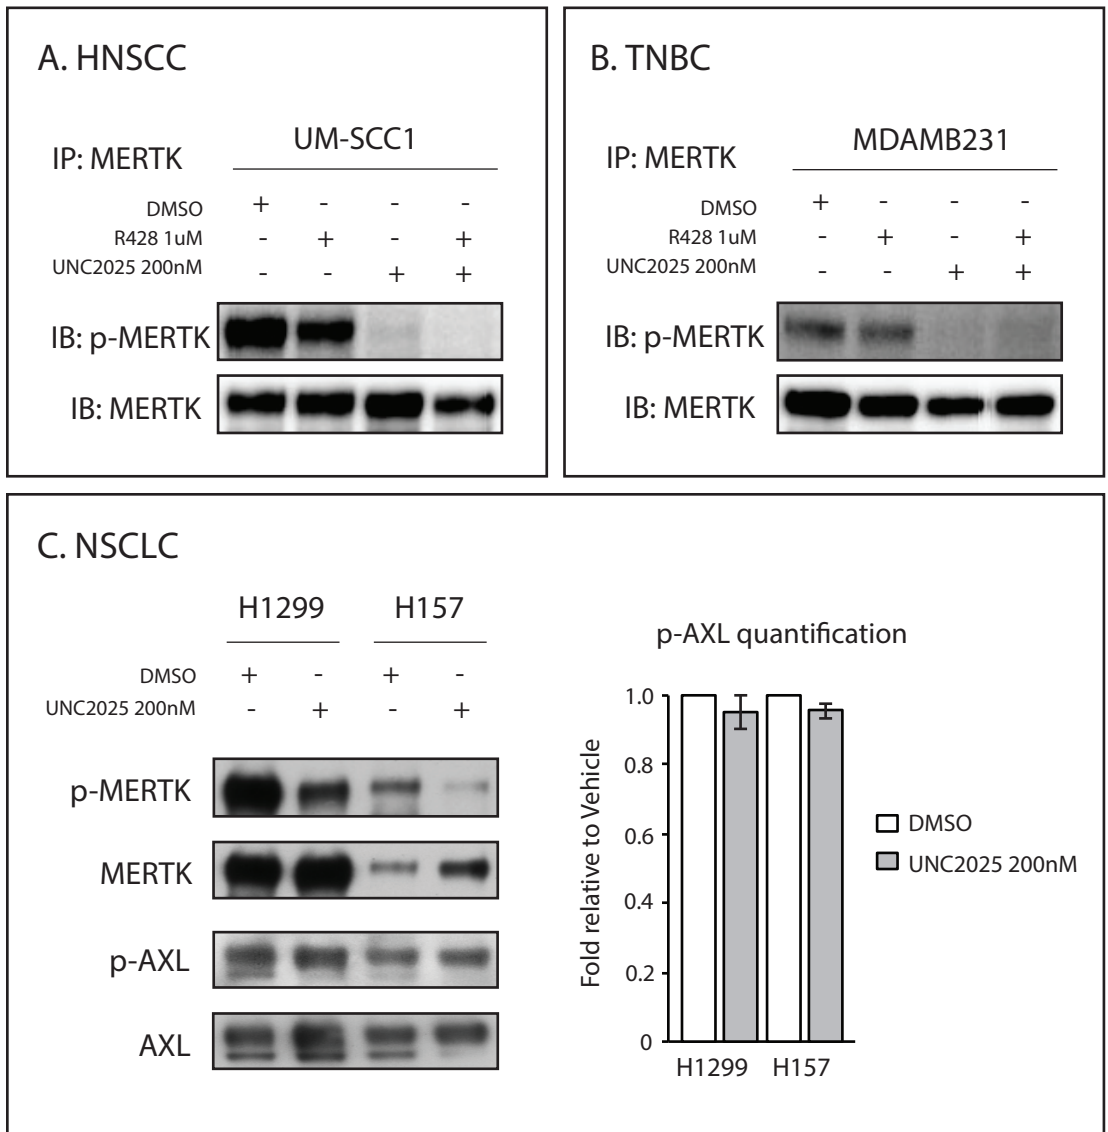

**Figure S3: Evaluation of MERTK inhibitor UNC2025.**

Select HNSCC (A), TNBC (B), and NSCLC (C) cell lines were treated with vehicle (DMSO), R428 (1uM), and/or UNC2025 (200nM) for 24 hours. Following treatment, cell lysates were prepared, MERTK was immunoprecipitated, and phosphorylated and total MERTK and/or AXL proteins were detected by immunoblot. Phosphorylated MERTK levels were decreased after treatment with UNC2025. The images shown are representative of 2 or 3 independent experiments. (C) Phosphorylated AXL protein was quantitated by densitometry using Image J software. UNC2025 did not significantly affect AXL phosphorylation. Mean values and standard errors derived from 3 independent experiments are shown.
